# Supplementary material for: Bioinformatic Analysis of Lytic Polysaccharide Monooxygenases Reveals the Pan-Families Occurrence of Intrinsically Disordered C-Terminal Extensions
Source: MDPI journal article supplement (doi:10.3390/biom11111632), 2021-11-04
Supplement: s1 [file s1]

## Supplementary Information

**Table S1.** Number of LPMO sequences per family analyzed in this study.

| AA Family | Before Curation | After Curation | Removed Sequences (%) |
|-----------|-----------------|----------------|-----------------------|
| AA9       | 20,755          | 16,261         | 22%                   |
| AA10      | 6454            | 2872           | 55%                   |
| AA11      | 5261            | 4172           | 20%                   |
| AA13      | 662             | 475            | 28%                   |
| AA14      | 1657            | 1381           | 17%                   |
| AA15      | 648             | 517            | 20%                   |
| AA16      | 1770            | 1382           | 22%                   |

**Table S2.** List of LPMO-dCTRs identified in secretomes and transcriptomes.

| AA Family | Protein (UniProt) or Gene (GenBank) | Organism                      | Regulation                  | Growth On                                                  | Reference |
|-----------|-------------------------------------|-------------------------------|-----------------------------|------------------------------------------------------------|-----------|
| AA9       | EAA65609.1                          | <i>Aspergillus nidulans</i>   | Transcription               | Pectin                                                     | [64]      |
| AA9       | EAA64499.1/<br>Q5BAP2               | <i>Aspergillus nidulans</i>   | Transcription/<br>Secretion | Pectin, starch                                             | [64,65]   |
| AA9       | EAA63617.1/<br>Q5B8T4               | <i>Aspergillus nidulans</i>   | Transcription/<br>Secretion | Cellulose,<br>biomass<br>sorghum,<br>xyloglucan,<br>starch | [64,65]   |
| AA9       | B2ARG6                              | <i>Podospora anserina</i>     | Secretion                   | Sugar beet pulp                                            | [66]      |
| AA9       | A0A1C9ZMC5                          | <i>Gloeophyllum trabeum</i>   | Transcription               | Highley's<br>medium +<br>glucose                           | [67]      |
| AA9       | BAV57614.1                          | <i>Gloeophyllum trabeum</i>   | Transcription               | Highley's<br>medium +<br>glucose                           | [67]      |
| AA14      | XP_007393138.1                      | <i>Phanerochaete carnosae</i> | Transcription               | Aspen and<br>spruce                                        | [68]      |
| AA9       | XP_007400275                        | <i>Phanerochaete carnosae</i> | Transcription               | Aspen and<br>spruce                                        | [68]      |

|      |                |                                    |               |                                                |      |
|------|----------------|------------------------------------|---------------|------------------------------------------------|------|
| AA14 | XP_007393767.1 | <i>Phanerochaete<br/>carnosa</i>   | Transcription | Aspen and<br>spruce                            | [68] |
| AA9  | G0SA07         | <i>Chaetomium<br/>thermophilum</i> | Secretion     | arabinose and<br>microcrystalline<br>cellulose | [69] |
| AA9  | G0S4L0         | <i>Chaetomium<br/>thermophilum</i> | Secretion     | arabinose and<br>microcrystalline<br>cellulose | [69] |
| AA9  | OSC96684.1     | <i>Pycnoporus<br/>coccineus</i>    | Transcription | Maltose, pine<br>and aspen                     | [70] |
| AA9  | OSC98651.1     | <i>Pycnoporus<br/>coccineus</i>    | Transcription | Maltose, pine<br>and aspen                     | [70] |
| AA9  | OSC98645.1     | <i>Pycnoporus<br/>coccineus</i>    | Transcription | Maltose, pine<br>and aspen                     | [70] |
| AA9  | OSC98630.1     | <i>Pycnoporus<br/>coccineus</i>    | Transcription | Maltose, pine<br>and aspen                     | [70] |
| AA9  | OSD06900.1     | <i>Pycnoporus<br/>coccineus</i>    | Transcription | Maltose, pine<br>and aspen                     | [70] |

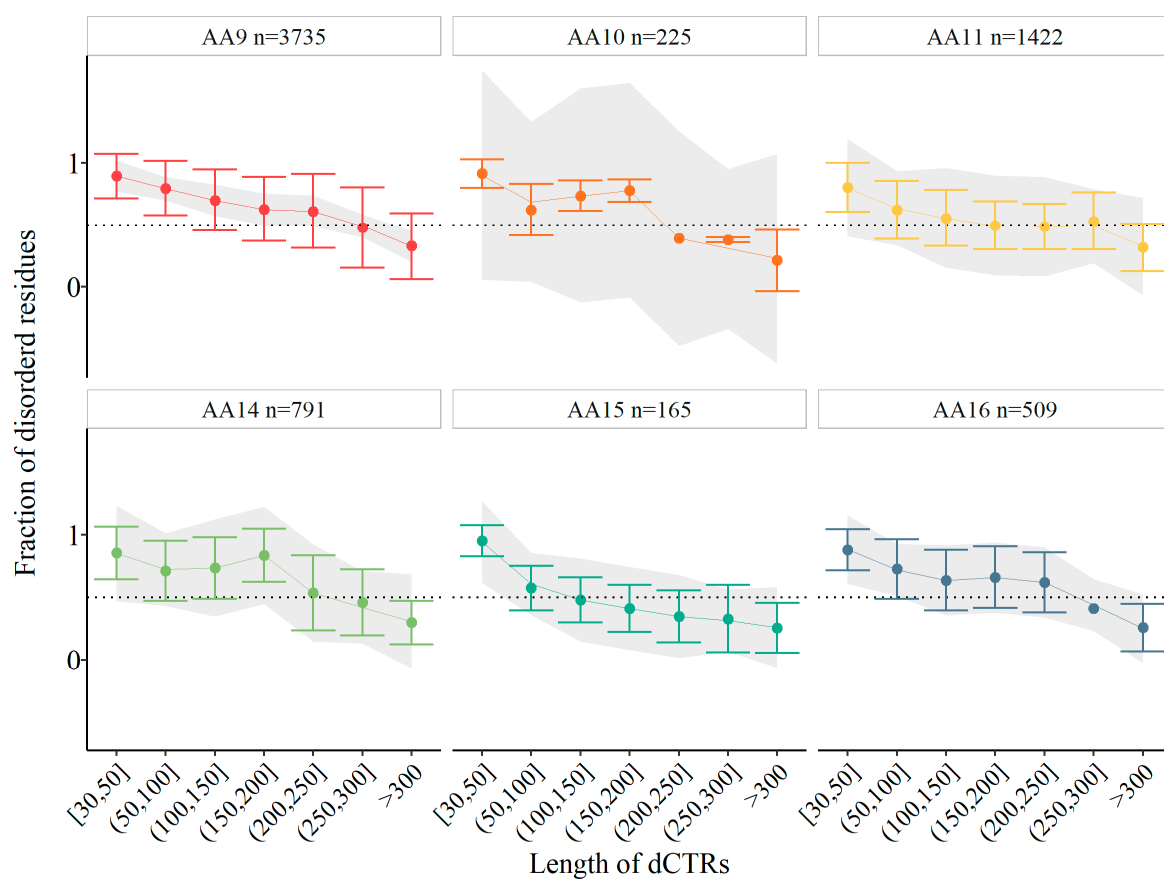

**Figure S1.** Length and disorder content of dCTRs. The graphs show the mean value of fraction of disordered residues of dCTRs with different lengths across LPMOs families. The error bars denote the standard deviation of the mean, the area in grey denotes the 95% confidence level interval. The dotted line represents the fraction of disorder residues equal to 0.5.

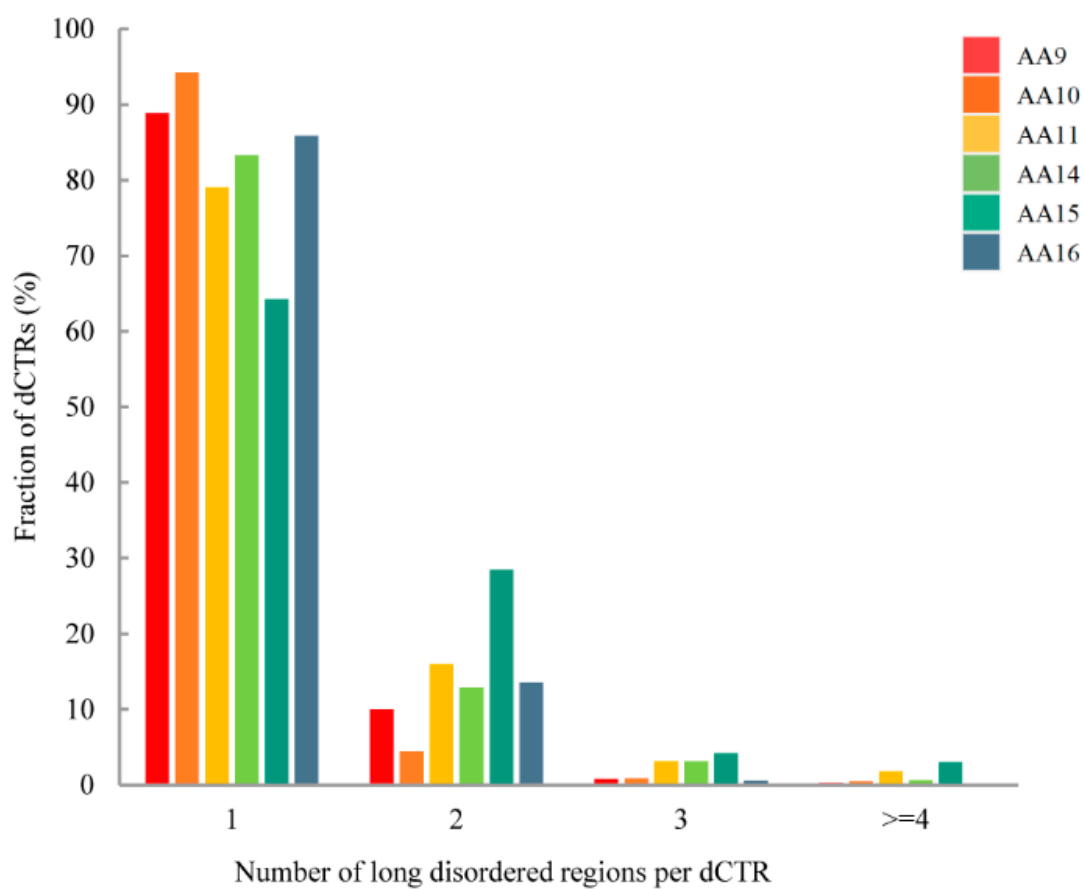

**Figure S2.** Frequency distribution of the number of long disordered regions (LDRs) per dCTR across the different LPMO families.

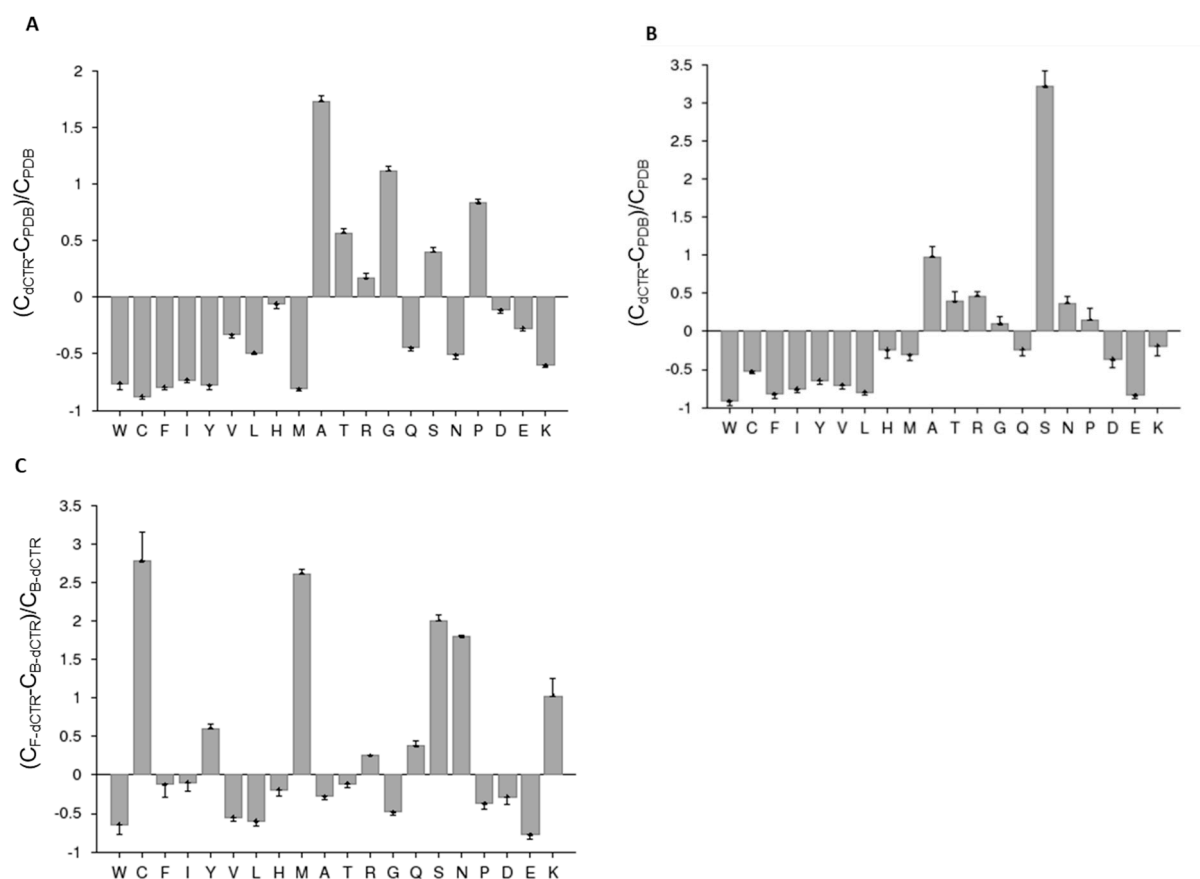

**Figure S3.** Compositional profile of dCTRs from AA10 LPMOs as generated by the Compositional Profiler tool (<http://cprofiler.org/cgi-bin/profiler.cgi>). (A,B) Compositional profile of dCTRs from bacterial (A) or fungal (B) AA10 with respect to the PDB database. In the two graphs, the fractional difference in the amino acid composition was evaluated as  $(C_{dCTR} - C_{PDB}) / C_{PDB}$ , where  $C_{dCTR}$  is the content of the given amino acid in the ensemble of dCTRs under investigation, and  $C_{PDB}$  is the corresponding content in the PDB database. (C) Difference in amino acid composition between fungal and bacterial AA10 dCTRs. The latter was calculated as  $(C_{F-dCTR} - C_{B-dCTR}) / C_{B-dCTR}$ , where  $C_{F-dCTR}$  is the content of a given amino acid in the ensemble of dCTRs in fungal AA10 and  $C_{B-dCTR}$  is the corresponding content in bacterial AA10 dCTRs.

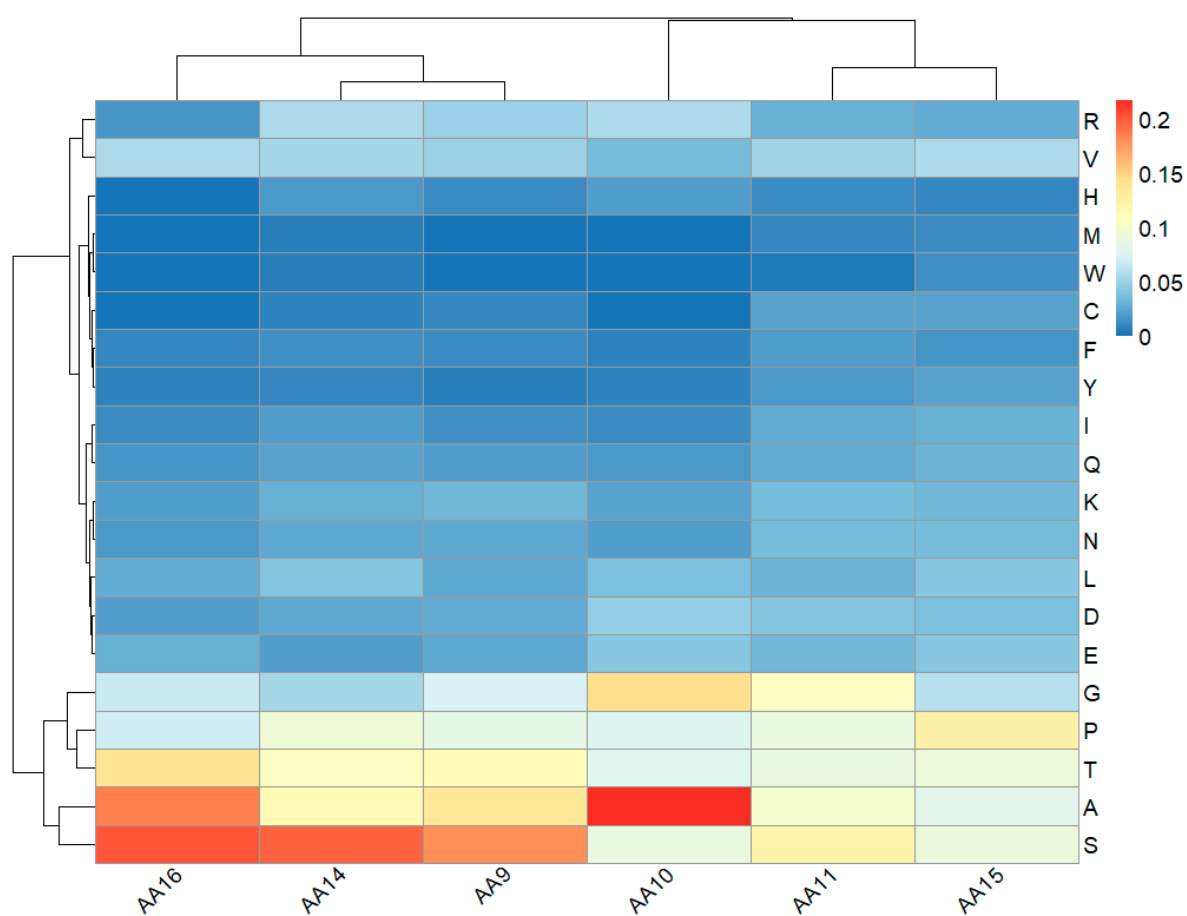

**Figure S4.** Amino acid composition of dCTRs across the different LPMO families. The heatmap shows the average amino acid content in the dCTRs of the different LPMO families. The color scale represents values ranging from 0 (blue) to 0.2 (red), where 0.2 indicates that an amino acid has a frequency of 20%, on average, in a given dCTR family. Clustering was performed by euclidean distance metric.

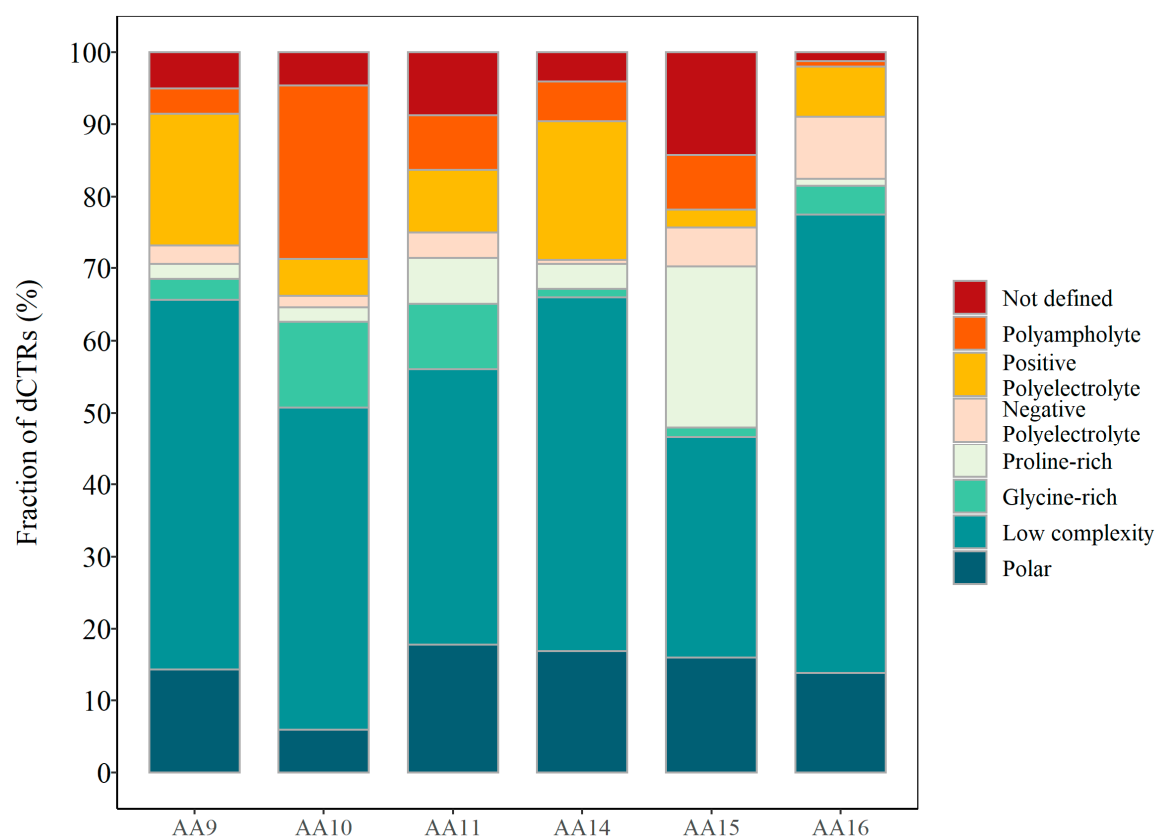

**Figure S5.** Occurrence of sequence features in dCTRs as predicted by MobiDB-lite 3.0. Each histogram divides each LPMO family based on seven sequence features, namely polyampholyte, positive polyelectrolyte, negative polyelectrolyte, Pro-rich, Gly-rich, low complexity and polar.

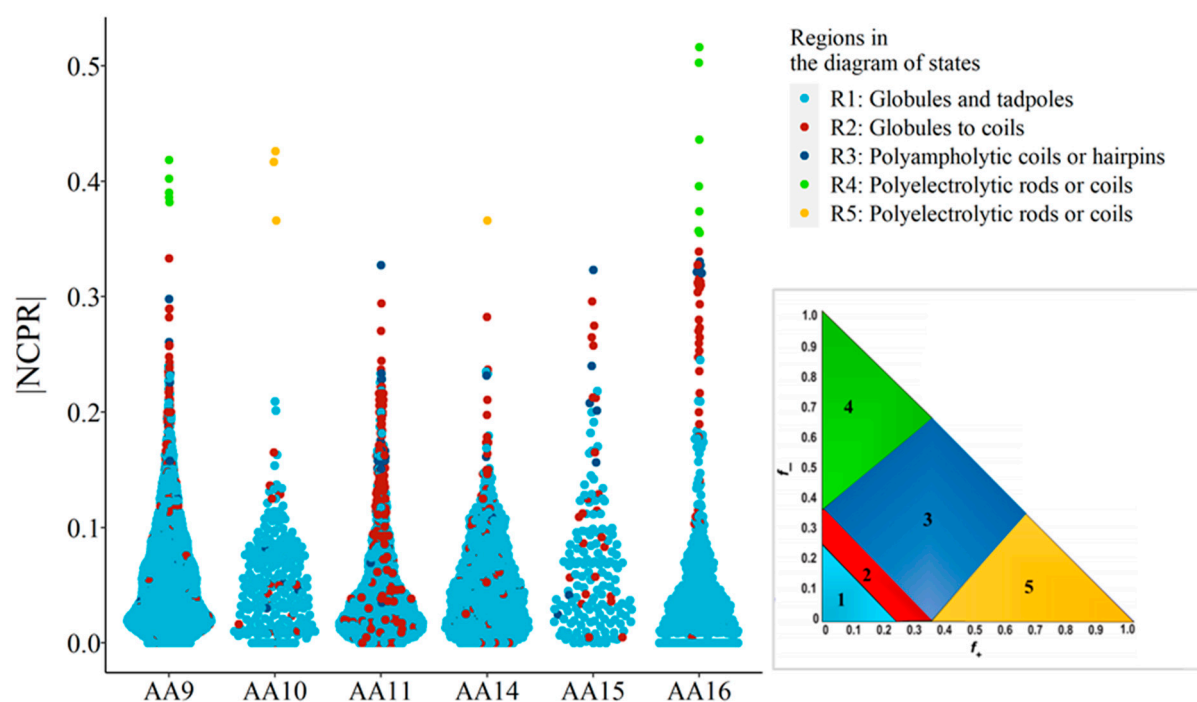

**Figure S6.** Distribution of absolute net charge per residue (NCPR) of dCTRs sequences across LPMO families. Each dot represents a sequence and the color of the dot is associated to the region the dCTR occupies in the diagram of states. The insert is a representation of the diagram of states. " $f_-$ " is the fraction of negative residues, " $f_+$ " is the fraction of positive residues.



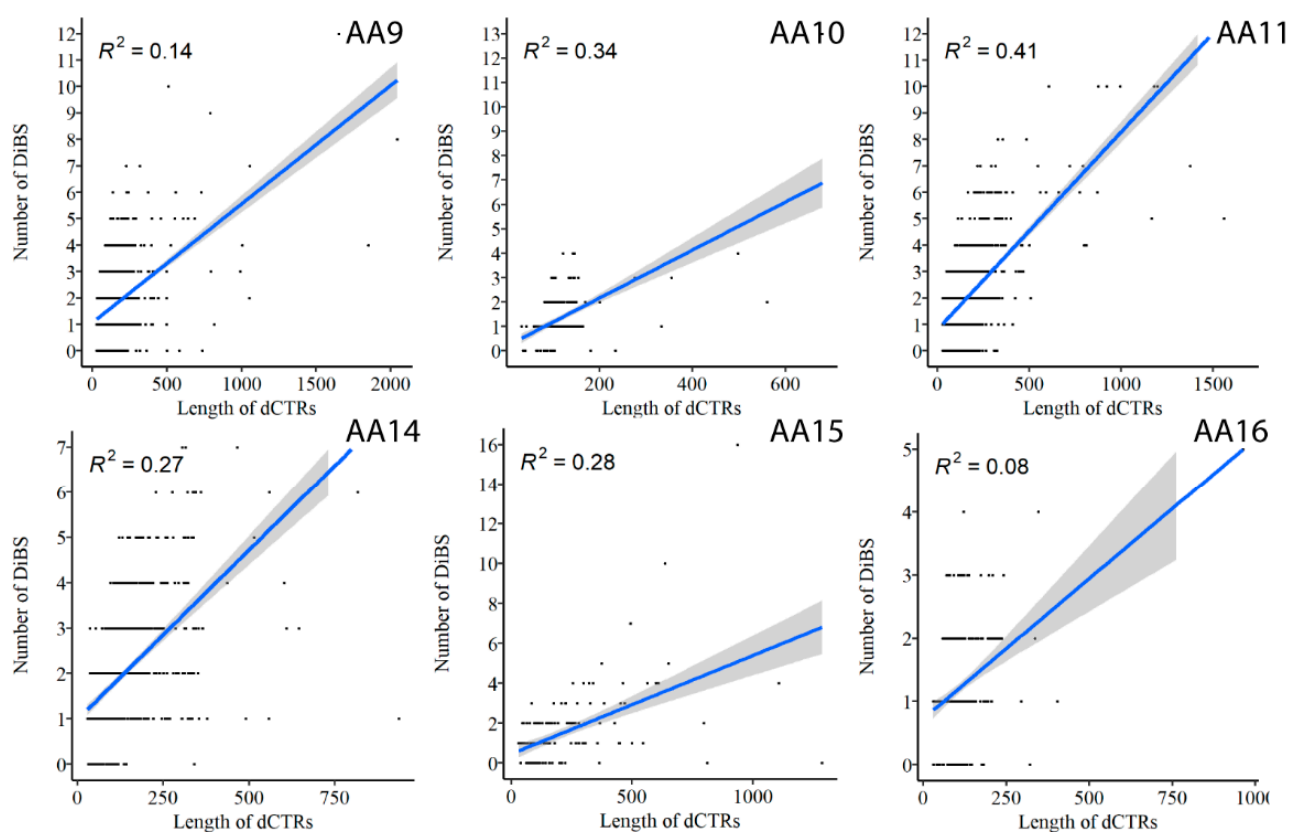

**Figure S7.** Scatter plot of the number of DiBSs as a function of the length of dCTRs across LPMO families. Each dot represents a sequence, the blue line is the regression line, and the area in grey denotes the 95% confidence level interval.

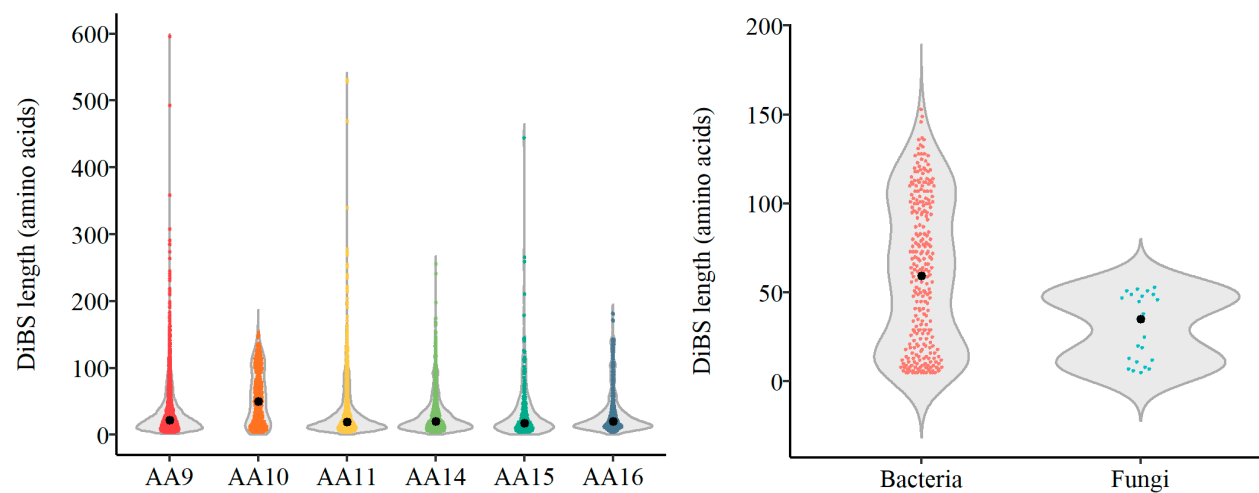

**Figure S8.** Length of DiBSs in dCTRs among LPMO families (A) and among bacterial and fungal dCTRs of the AA10 family (B). The black dot corresponds to the median.
